# Supplementary material for: Snail Family Members Unequally Trigger EMT and Thereby Differ in Their Ability to Promote the Neoplastic Transformation of Mammary Epithelial Cells
Source: PubMed Central journal article supplement (PMC3956896; doi:10.1371/journal.pone.0092254), 2014-03-17
Supplement: pone.0092254.s002.pdf [file pone.0092254.s002.pdf]

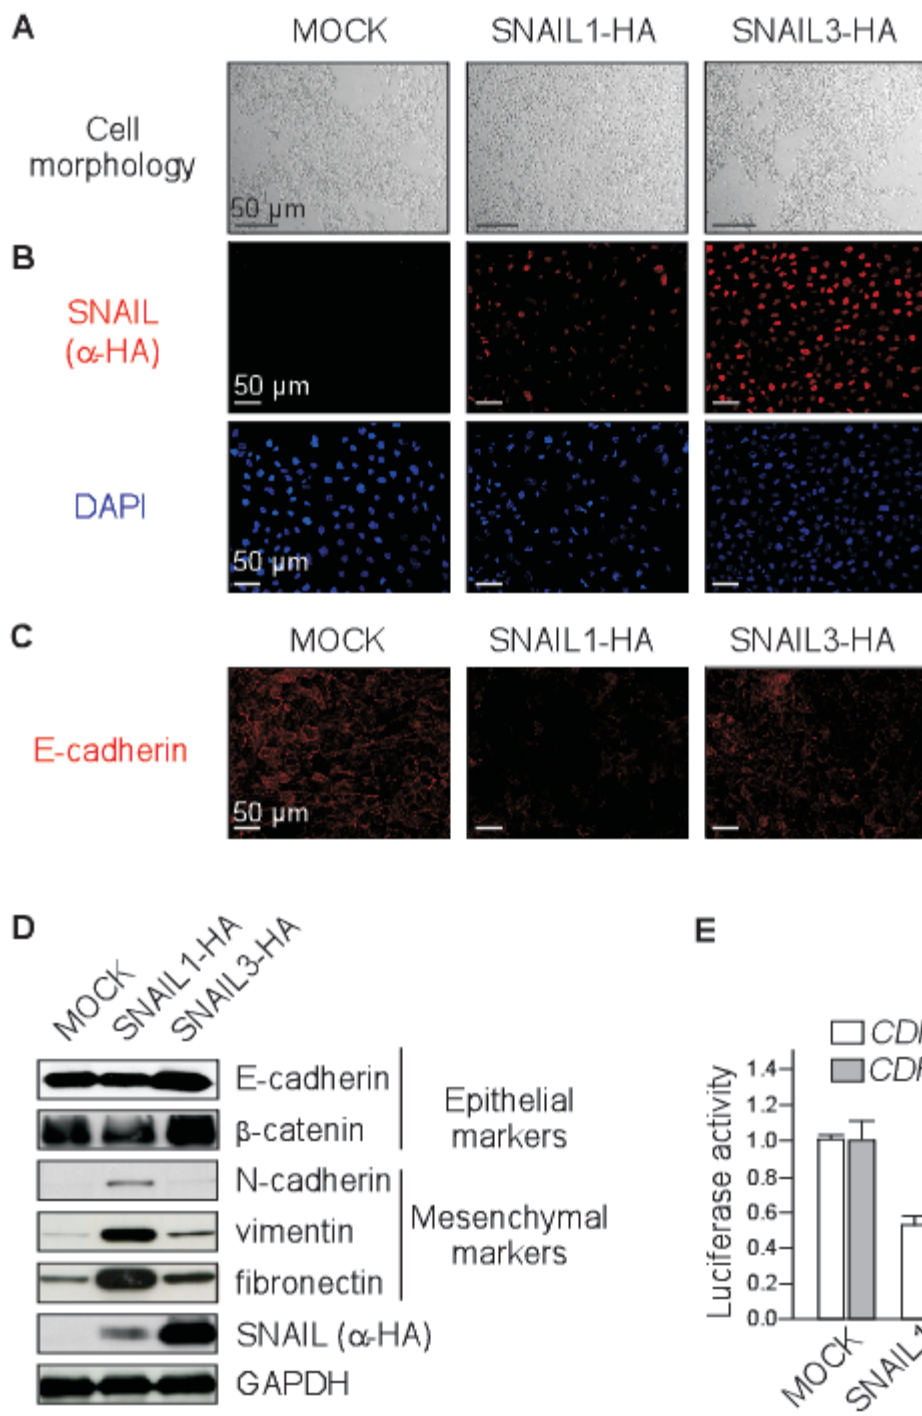

Figure S2
