# Supplementary material for: Snail Family Members Unequally Trigger EMT and Thereby Differ in Their Ability to Promote the Neoplastic Transformation of Mammary Epithelial Cells
Source: PubMed Central journal article supplement (PMC3956896; doi:10.1371/journal.pone.0092254), 2014-03-17
Supplement: pone.0092254.s003.pdf [file pone.0092254.s003.pdf]

Table S1

| Gene      | HMEC-hTERT<br>SNAIL1 |         | HMEC-hTERT<br>SNAIL2 |         | HMEC-hTERT<br>SNAIL3 |         | MCF10A<br>SNAIL1 | MCF10A<br>SNAIL2 | MCF10A<br>SNAIL3 |
|-----------|----------------------|---------|----------------------|---------|----------------------|---------|------------------|------------------|------------------|
|           | FC                   | P-value | FC                   | P-value | FC                   | P-value | FC               | FC               | FC               |
| SNX10     | -1,61                | 4,6E-06 | -1,03                | 6,0E-01 | -1,01                | 8,7E-01 | -2,10            | -1,66            | -1,32            |
| TP73L     | -2,33                | 3,0E-03 | 1,29                 | 1,4E-01 | 1,32                 | 7,5E-02 | -4,20            | -2,37            | -1,67            |
| KCNK1     | -1,55                | 1,8E-03 | -1,12                | 3,4E-01 | -1,09                | 4,2E-01 | -1,44            | -1,01            | -1,05            |
| BDKRB2    | -1,10                | 3,6E-02 | 1,00                 | 9,6E-01 | -1,04                | 3,9E-01 | -1,17            | -1,18            | 1,03             |
| ANXA8     | -1,94                | 5,1E-04 | -1,07                | 5,9E-01 | 1,01                 | 9,5E-01 | -3,28            | -1,66            | -1,56            |
| ANXA8L1   | -1,70                | 7,2E-03 | -1,18                | 3,4E-01 | 1,15                 | 2,7E-01 | -2,31            | -1,45            | -1,37            |
| LOC653562 | 1,03                 | 2,2E-01 | -1,02                | 5,9E-01 | -1,01                | 7,5E-01 | -1,05            | -1,10            | -1,02            |
| RHBDP2    | 1,11                 | 1,7E-01 | 1,18                 | 7,2E-02 | 1,05                 | 5,2E-01 | -1,31            | -1,14            | -1,07            |
| SLC6A10P  | 1,32                 | 1,3E-01 | 1,01                 | 9,7E-01 | -1,01                | 9,7E-01 | -1,23            | -1,16            | -1,06            |
| SLC6A8    | 1,24                 | 2,7E-01 | -1,02                | 9,4E-01 | 1,06                 | 8,0E-01 | -1,14            | -1,03            | -1,09            |
| KRT18     | -1,27                | 6,2E-04 | -1,08                | 2,1E-01 | 1,04                 | 4,4E-01 | -1,23            | -1,05            | -1,11            |
| CDS1      | -3,76                | 9,6E-07 | -1,61                | 1,4E-03 | -1,25                | 3,1E-02 | -5,28            | -2,37            | -1,89            |
| THBD      | -1,01                | 9,8E-01 | 1,82                 | 1,5E-01 | 1,44                 | 3,6E-01 | -1,49            | -1,20            | -1,09            |
| NEFM      | -1,01                | 9,0E-01 | 1,09                 | 2,1E-01 | 1,12                 | 7,4E-02 | 1,09             | 1,15             | 1,16             |
| RPS6KA1   | -1,31                | 4,2E-03 | 1,07                 | 3,8E-01 | -1,01                | 8,6E-01 | -1,75            | -1,38            | -1,21            |
| SMPDL3B   | -1,62                | 7,1E-08 | -1,54                | 1,0E-06 | -1,17                | 8,2E-04 | -1,66            | -1,44            | -1,37            |
| ABCA12    | -1,40                | 2,1E-05 | -1,34                | 2,8E-04 | -1,15                | 1,1E-02 | -1,26            | -1,16            | -1,14            |
| RHOD      | -1,46                | 1,1E-04 | -1,04                | 5,7E-01 | -1,00                | 9,9E-01 | -1,94            | -1,53            | -1,38            |
| KRT14     | -2,55                | 5,0E-03 | 1,01                 | 9,4E-01 | 1,11                 | 5,6E-01 | -1,66            | -1,06            | 1,22             |
| PRKCH     | -1,32                | 2,7E-02 | -1,43                | 2,3E-02 | -1,22                | 1,0E-01 | -1,19            | -1,29            | -1,23            |
| ZBED2     | 1,07                 | 7,4E-01 | 1,47                 | 8,5E-02 | 1,21                 | 3,6E-01 | -3,22            | -1,72            | -1,52            |
| C10ORF10  | -1,29                | 3,8E-01 | -1,32                | 4,3E-01 | -1,02                | 9,5E-01 | 1,02             | -1,01            | -1,01            |
| LRRC1     | -1,71                | 8,4E-06 | -1,24                | 1,0E-02 | -1,16                | 3,3E-02 | -1,56            | -1,34            | -1,25            |
| STAP2     | -1,51                | 2,5E-06 | -1,15                | 1,4E-02 | -1,09                | 5,6E-02 | -1,17            | -1,22            | -1,16            |
| JUP       | -3,53                | 6,7E-06 | -1,87                | 1,2E-03 | -1,40                | 1,3E-02 | -2,02            | -1,57            | -1,48            |
| IL4R      | -1,70                | 8,7E-05 | 1,06                 | 5,0E-01 | 1,08                 | 3,0E-01 | -1,59            | -1,38            | -1,31            |
| PERP      | -2,23                | 1,2E-03 | -1,42                | 8,0E-02 | -1,11                | 5,0E-01 | -2,04            | -1,15            | -1,30            |
| FGFBP1    | -14,84               | 7,8E-05 | -1,41                | 1,4E-01 | -1,07                | 7,0E-01 | -12,23           | -2,82            | -2,47            |
| MYO1D     | -1,25                | 1,6E-03 | 1,19                 | 5,7E-03 | 1,14                 | 2,0E-02 | -1,54            | -1,28            | -1,17            |
| FAT2      | -2,59                | 1,5E-03 | -1,19                | 3,7E-01 | -1,05                | 7,6E-01 | -1,86            | -1,51            | -1,36            |
| WWC1      | -2,02                | 2,6E-06 | -1,50                | 5,0E-04 | -1,37                | 1,1E-03 | -2,18            | -1,65            | -1,29            |
| FZD3      | -1,12                | 9,5E-02 | -1,23                | 2,0E-02 | -1,08                | 2,5E-01 | -1,44            | -1,36            | -1,14            |
| ZNF165    | -2,45                | 2,7E-08 | -1,40                | 1,7E-04 | -1,38                | 9,2E-05 | -2,06            | -1,87            | -1,77            |
| SNCA      | -1,31                | 3,8E-02 | 1,31                 | 2,4E-02 | 1,09                 | 4,1E-01 | -1,27            | -1,53            | -1,61            |
| PRSS8     | -4,33                | 3,3E-07 | -2,12                | 6,4E-05 | -1,48                | 1,3E-03 | -2,63            | -1,63            | -1,26            |
| SH2D3A    | -1,28                | 2,0E-02 | 1,06                 | 5,3E-01 | 1,10                 | 2,8E-01 | -1,53            | -1,28            | -1,12            |
| GNAL      | -1,00                | 9,7E-01 | 1,06                 | 7,7E-02 | 1,02                 | 5,5E-01 | 1,02             | 1,05             | 1,09             |
| BIK       | -2,14                | 1,5E-05 | -1,02                | 8,6E-01 | 1,05                 | 5,0E-01 | -2,85            | -1,82            | -1,53            |
| CDH3      | -3,53                | 4,8E-06 | -1,22                | 1,1E-01 | -1,07                | 5,0E-01 | -3,88            | -1,88            | -1,42            |
| KIAA0888  | 1,02                 | 5,3E-01 | 1,02                 | 6,6E-01 | 1,08                 | 6,5E-02 | -1,01            | -1,07            | -1,05            |
| KRT5      | -3,66                | 1,6E-03 | -1,05                | 8,2E-01 | 1,05                 | 8,0E-01 | -5,98            | -1,80            | -1,38            |
| GJB3      | -2,09                | 3,0E-05 | 1,00                 | 9,9E-01 | -1,02                | 8,1E-01 | -2,00            | -1,61            | -1,39            |
| KIAA0040  | -1,69                | 4,3E-07 | -1,17                | 8,8E-03 | -1,10                | 5,4E-02 | -1,20            | -1,16            | -1,01            |
| CELSR2    | -2,40                | 7,6E-07 | -1,73                | 8,8E-05 | -1,34                | 2,0E-03 | -1,68            | -1,16            | -1,32            |
| F11R      | -1,64                | 1,7E-02 | -1,06                | 7,6E-01 | 1,01                 | 9,5E-01 | -2,19            | -1,56            | -1,53            |
| NUP62CL   | -2,63                | 2,6E-10 | -1,24                | 1,8E-04 | -1,15                | 1,7E-03 | -2,30            | -1,44            | -1,19            |
| SERPIN1   | -4,05                | 5,4E-07 | -3,31                | 6,5E-06 | -1,90                | 8,0E-05 | 1,14             | -1,01            | -1,06            |
| SPINT2    | -4,57                | 5,6E-06 | -1,43                | 2,5E-02 | -1,13                | 3,0E-01 | -7,17            | -2,69            | -1,92            |
| POLR3G    | -1,08                | 4,6E-01 | 1,03                 | 7,9E-01 | 1,05                 | 6,7E-01 | -1,73            | -1,40            | -1,32            |
| ELMO3     | -1,58                | 6,5E-03 | 1,06                 | 6,5E-01 | 1,03                 | 7,7E-01 | -1,45            | -1,28            | -1,05            |
| IL1RN     | -2,07                | 4,5E-09 | -1,89                | 8,1E-08 | -1,39                | 4,6E-06 | 1,00             | 1,01             | 1,08             |
| TSPAN1    | -2,21                | 2,7E-05 | -1,71                | 1,2E-03 | -1,27                | 2,9E-02 | -1,04            | 1,02             | -1,06            |
| IFI30     | -1,05                | 5,0E-01 | -1,11                | 2,6E-01 | -1,05                | 5,6E-01 | -1,21            | -1,10            | -1,05            |
| PLS1      | -3,44                | 2,5E-07 | -1,52                | 9,2E-04 | -1,23                | 1,9E-02 | -3,75            | -1,75            | -1,59            |
| TMPPRS11E | -1,04                | 2,8E-01 | 1,03                 | 4,9E-01 | -1,02                | 5,2E-01 | 1,18             | -1,01            | -1,01            |
| C10RF116  | -4,86                | 4,0E-08 | -1,72                | 1,1E-04 | -1,34                | 2,1E-03 | -3,61            | -2,09            | -1,73            |
| ALOX15B   | 1,50                 | 2,1E-01 | 1,15                 | 7,5E-01 | 1,09                 | 8,2E-01 | 1,29             | 1,33             | 1,34             |
| COL17A1   | -1,42                | 1,5E-01 | 1,25                 | 2,9E-01 | 1,28                 | 1,9E-01 | -3,32            | -1,59            | -1,39            |
| RTEL1     | 1,04                 | 2,0E-01 | 1,08                 | 5,2E-02 | -1,05                | 1,9E-01 | -1,05            | -1,01            | -1,13            |
| TNFRSF6B  | 1,04                 | 8,0E-01 | 2,14                 | 1,3E-04 | 1,77                 | 1,2E-03 | -2,13            | -1,33            | -1,19            |
| LAD1      | -2,51                | 3,3E-05 | -1,20                | 1,5E-01 | -1,05                | 6,2E-01 | -5,08            | -1,81            | -1,39            |
| PTPN3     | -1,56                | 8,2E-09 | -1,01                | 8,0E-01 | -1,03                | 2,2E-01 | -1,20            | -1,11            | -1,01            |
| MST1R     | -2,16                | 3,0E-07 | -1,51                | 1,3E-04 | -1,20                | 8,2E-03 | -2,14            | -1,50            | -1,27            |
| EPHA1     | -3,36                | 2,4E-05 | -1,48                | 2,2E-02 | -1,22                | 1,2E-01 | -2,02            | -1,47            | -1,47            |
| SPINT1    | -1,81                | 2,9E-04 | -1,41                | 1,7E-02 | -1,16                | 1,7E-01 | -1,52            | -1,32            | -1,16            |
| E2F5      | -1,83                | 3,8E-05 | -1,53                | 1,4E-03 | -1,28                | 1,3E-02 | -2,22            | -1,68            | -1,37            |
| KRT6B     | -2,99                | 6,5E-05 | 1,02                 | 8,5E-01 | 1,20                 | 1,0E-01 | -2,43            | -1,76            | -1,42            |
| STAC      | -1,35                | 4,6E-03 | -1,14                | 2,0E-01 | -1,09                | 3,0E-01 | -1,10            | 1,15             | 1,08             |
| ITGB4     | -2,04                | 4,1E-04 | -1,06                | 6,8E-01 | 1,07                 | 5,5E-01 | -1,03            | -1,26            | -1,19            |
| C6ORF105  | -1,09                | 2,3E-01 | 1,32                 | 2,4E-03 | 1,22                 | 1,1E-02 | -1,30            | -1,09            | -1,08            |
| GLS2      | -1,28                | 1,7E-04 | -1,12                | 4,9E-02 | -1,09                | 7,6E-02 | -1,23            | -1,30            | -1,25            |
| ANXA3     | -2,51                | 4,5E-04 | -1,02                | 9,2E-01 | -1,06                | 6,5E-01 | -3,68            | -1,35            | -1,13            |
| DST       | -1,33                | 6,2E-03 | 1,03                 | 7,2E-01 | 1,09                 | 2,9E-01 | -1,53            | -1,38            | -1,28            |
| ARHGAP25  | -1,07                | 2,7E-01 | 1,22                 | 7,0E-03 | 1,13                 | 5,3E-02 | -1,11            | -1,05            | 1,01             |
| DSC2      | -2,76                | 3,9E-02 | -1,86                | 1,8E-01 | -1,41                | 3,4E-01 | -2,11            | -1,42            | -1,38            |
| SLC6A8    | 1,24                 | 2,7E-01 | -1,02                | 9,4E-01 | 1,06                 | 8,0E-01 | -1,14            | -1,03            | -1,09            |
| LSR       | -1,33                | 1,0E-06 | -1,13                | 3,2E-03 | -1,04                | 1,7E-01 | -1,29            | -1,18            | -1,19            |

| Gene      | HMEC-hTERT<br>SNAIL1 |         | HMEC-hTERT<br>SNAIL2 |         | HMEC-hTERT<br>SNAIL3 |         | MCF10A<br>SNAIL1 | MCF10A<br>SNAIL2 | MCF10A<br>SNAIL3 |
|-----------|----------------------|---------|----------------------|---------|----------------------|---------|------------------|------------------|------------------|
|           | FC                   | P-value | FC                   | P-value | FC                   | P-value | FC               | FC               | FC               |
| CLDN1     | -2,99                | 1,1E-05 | -3,80                | 2,3E-05 | -1,95                | 3,1E-04 | -3,33            | -2,30            | -1,76            |
| CYP4F11   | -1,49                | 3,7E-02 | -1,00                | 1,0E+00 | -1,06                | 7,0E-01 | 2,31             | 1,89             | 1,71             |
| CCND2     | -1,10                | 3,3E-01 | 1,13                 | 2,6E-01 | 1,05                 | 6,4E-01 | -3,62            | -2,11            | -1,89            |
| FGFR2     | 1,02                 | 5,8E-01 | 1,01                 | 7,0E-01 | 1,04                 | 2,9E-01 | -1,05            | -1,04            | -1,00            |
| ABLIM1    | -2,05                | 6,8E-06 | -1,29                | 1,4E-02 | -1,04                | 5,9E-01 | -1,99            | -1,41            | -1,35            |
| XDH       | -1,55                | 2,1E-03 | 1,25                 | 3,6E-02 | 1,21                 | 4,9E-02 | -2,50            | -1,61            | -1,39            |
| CAMK2B    | -1,18                | 1,0E-02 | -1,08                | 2,3E-01 | -1,05                | 3,9E-01 | -1,35            | -1,26            | -1,31            |
| DSG3      | -3,19                | 1,1E-03 | -1,50                | 1,0E-01 | -1,15                | 4,6E-01 | -2,75            | -1,80            | -1,78            |
| OCLN      | -1,03                | 6,7E-02 | -1,06                | 2,1E-02 | -1,03                | 1,2E-01 | 1,02             | 1,01             | 1,05             |
| KRT17     | -1,24                | 1,4E-01 | -1,24                | 2,1E-01 | 1,02                 | 9,0E-01 | -3,56            | -1,77            | -1,37            |
| SAA1      | -5,58                | 1,6E-05 | -2,56                | 8,9E-04 | -1,27                | 1,1E-01 | -1,98            | -1,67            | -1,31            |
| PRRG4     | -1,58                | 3,5E-04 | -1,36                | 1,1E-02 | -1,17                | 8,6E-02 | -1,29            | -1,03            | -1,18            |
| ANK3      | -1,16                | 1,6E-01 | -1,02                | 8,6E-01 | 1,04                 | 6,9E-01 | -1,08            | -1,18            | -1,12            |
| TMPRSS4   | -1,50                | 3,0E-05 | -1,47                | 2,0E-04 | -1,38                | 2,7E-04 | 1,05             | 1,04             | 1,03             |
| CST6      | -4,64                | 1,3E-05 | -3,67                | 1,2E-04 | -1,74                | 3,1E-03 | -1,71            | -1,44            | -1,39            |
| NDRG1     | 1,72                 | 1,6E-01 | 1,88                 | 1,5E-01 | 1,38                 | 4,6E-01 | 1,48             | 1,31             | 1,09             |
| S100A8    | -1,35                | 3,8E-01 | -1,32                | 4,8E-01 | 1,04                 | 9,1E-01 | -1,78            | -1,17            | -1,06            |
| CORO1A    | -2,38                | 1,9E-04 | -1,27                | 1,2E-01 | -1,07                | 5,8E-01 | -1,32            | -1,17            | -1,08            |
| KLK5      | -21,16               | 1,3E-07 | -7,72                | 2,0E-06 | -3,31                | 5,7E-06 | 1,00             | 1,06             | 1,02             |
| EXPH5     | -1,57                | 5,7E-06 | -1,35                | 5,0E-04 | -1,17                | 1,0E-02 | -1,58            | -1,61            | -1,37            |
| IRX4      | -1,08                | 4,5E-01 | -1,22                | 1,3E-01 | -1,11                | 3,5E-01 | 1,17             | 1,18             | 1,19             |
| IRF6      | -3,43                | 4,1E-05 | -1,59                | 1,5E-02 | -1,21                | 1,6E-01 | -2,66            | -1,88            | -1,64            |
| HOOK1     | -3,28                | 8,1E-08 | -1,99                | 1,3E-05 | -1,39                | 6,3E-04 | -2,93            | -2,10            | -2,00            |
| ARTN      | -1,38                | 3,7E-03 | 1,05                 | 6,1E-01 | 1,04                 | 6,2E-01 | 1,02             | -1,05            | 1,01             |
| FLJ12684  | -1,88                | 2,0E-04 | -1,04                | 7,0E-01 | 1,01                 | 9,3E-01 | -3,06            | -1,89            | -1,45            |
| SLC2A9    | -1,34                | 2,4E-03 | 1,15                 | 7,6E-02 | 1,12                 | 9,9E-02 | -1,48            | -1,23            | -1,16            |
| KLK8      | -2,84                | 1,2E-06 | -2,54                | 1,3E-05 | -1,86                | 5,6E-05 | -1,08            | 1,06             | 1,01             |
| TMEM40    | -1,61                | 6,0E-04 | -1,21                | 1,0E-01 | 1,03                 | 7,6E-01 | -1,34            | -1,24            | -1,16            |
| TRIM29    | -1,78                | 1,7E-05 | -1,30                | 8,9E-03 | -1,14                | 7,7E-02 | -1,34            | -1,35            | -1,32            |
| HBEGF     | -2,36                | 5,2E-03 | 1,45                 | 4,2E-02 | 1,37                 | 6,2E-02 | -1,64            | -1,56            | -1,46            |
| ALDH1A3   | -2,87                | 5,9E-08 | -1,04                | 5,1E-01 | 1,01                 | 8,6E-01 | -6,76            | -3,08            | -2,37            |
| MYO5C     | -5,93                | 2,5E-07 | -3,81                | 4,7E-06 | -1,82                | 1,5E-04 | -4,34            | -2,93            | -2,37            |
| CYP27B1   | -1,51                | 1,1E-03 | 1,50                 | 2,2E-04 | 1,18                 | 5,2E-02 | -4,02            | -2,06            | -1,68            |
| IL1B      | -1,04                | 9,4E-01 | 3,35                 | 1,1E-03 | 2,53                 | 8,4E-03 | -3,21            | -2,17            | -1,50            |
| NMU       | -8,36                | 2,4E-08 | -4,20                | 6,6E-07 | -2,34                | 3,7E-06 | -2,63            | -1,36            | -1,20            |
| KRT16     | -1,81                | 1,2E-01 | -1,75                | 2,1E-01 | -1,25                | 5,0E-01 | -1,54            | -1,22            | -1,16            |
| CDH1      | -5,25                | 2,7E-07 | -2,48                | 2,9E-05 | -1,46                | 2,0E-03 | -7,98            | -4,19            | -3,66            |
| JAG2      | -1,97                | 2,8E-04 | -1,27                | 8,6E-02 | -1,01                | 9,0E-01 | -2,08            | -1,51            | -1,36            |
| VSNL1     | -3,29                | 1,3E-04 | -1,46                | 5,2E-02 | -1,36                | 6,5E-02 | -1,64            | -1,25            | -1,29            |
| RLN2      | -1,42                | 9,4E-08 | -1,16                | 5,5E-04 | -1,13                | 8,6E-04 | -1,25            | -1,28            | -1,08            |
| CTS2      | -3,82                | 5,5E-06 | -2,54                | 1,6E-04 | -1,67                | 1,6E-03 | -1,76            | -1,17            | -1,09            |
| SYK       | -3,08                | 7,1E-08 | -1,54                | 2,0E-04 | -1,18                | 2,4E-02 | -2,10            | -1,51            | -1,34            |
| SAA1      | -5,58                | 1,6E-05 | -2,56                | 8,9E-04 | -1,27                | 1,1E-01 | -1,98            | -1,67            | -1,31            |
| EPB41L4B  | -1,13                | 1,4E-04 | -1,16                | 1,4E-04 | -1,10                | 1,1E-03 | -1,21            | -1,12            | -1,06            |
| RNF128    | -1,06                | 6,0E-02 | 1,02                 | 5,2E-01 | -1,00                | 8,9E-01 | -1,02            | 1,13             | 1,05             |
| ST14      | -6,44                | 1,4E-05 | -3,84                | 2,1E-04 | -1,99                | 1,8E-03 | -4,58            | -2,90            | -2,58            |
| LEPREL1   | 1,33                 | 7,5E-02 | 1,38                 | 8,7E-02 | 1,13                 | 4,8E-01 | -1,46            | -1,02            | -1,05            |
| PI3       | -1,89                | 2,3E-01 | -2,29                | 2,3E-01 | 1,59                 | 1,7E-01 | -1,50            | -1,04            | 1,34             |
| AP1M2     | -2,01                | 7,0E-05 | -1,30                | 3,9E-02 | 1,05                 | 5,7E-01 | -1,36            | -1,25            | -1,22            |
| CKMT1A    | -5,02                | 4,2E-06 | -1,77                | 2,9E-03 | -1,34                | 3,0E-02 | -3,64            | -2,01            | -1,72            |
| CKMT1B    | -3,66                | 2,8E-06 | -1,62                | 2,7E-03 | -1,17                | 1,2E-01 | -3,60            | -1,79            | -1,73            |
| GRHL2     | -2,73                | 1,3E-07 | -1,61                | 9,8E-05 | -1,13                | 7,5E-02 | 1,02             | 1,06             | 1,00             |
| ARHGAP8   | -1,27                | 7,3E-06 | -1,11                | 8,8E-03 | -1,01                | 6,5E-01 | -1,17            | -1,07            | -1,08            |
| LOC553158 | -1,02                | 7,2E-01 | 1,00                 | 1,0E+00 | 1,06                 | 3,3E-01 | -1,20            | -1,05            | 1,03             |
| IGFBP2    | -1,23                | 7,7E-01 | -1,16                | 8,6E-01 | -1,05                | 9,5E-01 | -1,20            | -1,26            | -1,27            |
| IL18      | -1,07                | 5,6E-01 | -1,08                | 5,4E-01 | 1,06                 | 5,8E-01 | 1,03             | 1,04             | 1,06             |
| CA9       | 1,36                 | 8,4E-01 | -1,08                | 9,7E-01 | -1,09                | 9,7E-01 | -1,02            | -1,07            | -1,02            |
| S100A14   | -3,37                | 1,8E-05 | -1,38                | 3,8E-02 | -1,02                | 8,8E-01 | -3,08            | -1,58            | -1,48            |
| CA2       | -2,65                | 2,1E-02 | -1,75                | 1,5E-01 | -1,40                | 2,7E-01 | -2,94            | -1,95            | -1,69            |
| KRT15     | -12,33               | 4,7E-07 | -3,60                | 2,7E-05 | -1,56                | 2,8E-03 | -2,08            | -1,58            | -1,68            |
| TMEM30B   | -3,49                | 2,1E-07 | -1,52                | 8,2E-04 | -1,12                | 1,4E-01 | -1,34            | -1,23            | -1,09            |
| S100A7    | -1,78                | 3,4E-01 | -1,62                | 4,8E-01 | -1,24                | 6,9E-01 | -1,06            | 1,03             | 1,07             |
| KLK7      | -16,38               | 8,0E-09 | -20,34               | 4,6E-08 | -4,11                | 1,5E-07 | 1,14             | 1,13             | 1,15             |
| LGALS7    | -1,22                | 3,6E-01 | -1,23                | 4,2E-01 | -1,16                | 5,0E-01 | -1,00            | 1,03             | 1,01             |
| FST       | -11,90               | 2,6E-04 | -1,83                | 5,1E-02 | -1,24                | 3,1E-01 | -1,23            | -1,29            | -1,11            |
| CXADR     | -5,15                | 5,1E-07 | -3,62                | 8,4E-06 | -1,93                | 1,2E-04 | -3,68            | -2,77            | -3,41            |
| SLPI      | -2,36                | 9,4E-04 | -2,33                | 3,4E-03 | -1,16                | 3,5E-01 | -1,43            | -1,11            | 1,06             |
| RBM35A    | -2,16                | 2,1E-07 | -1,24                | 5,8E-03 | -1,05                | 3,3E-01 | -1,25            | -1,23            | -1,23            |
| RAB25     | -9,87                | 2,6E-07 | -3,92                | 9,5E-06 | -1,84                | 2,6E-04 | -3,07            | -2,37            | -2,01            |
| UCHL1     | 1,12                 | 2,1E-01 | 1,03                 | 7,7E-01 | 1,08                 | 4,2E-01 | -1,27            | -1,15            | -1,15            |
| KLK10     | -5,73                | 3,1E-06 | -3,89                | 4,3E-05 | -2,27                | 1,9E-04 | -1,03            | 1,02             | 1,13             |
| TACSTD1   | -11,95               | 1,7E-07 | -4,07                | 6,8E-06 | -1,85                | 2,1E-04 | -13,82           | -4,93            | -3,90            |
| SERPINB2  | -10,65               | 4,1E-04 | -3,52                | 7,1E-03 | -1,81                | 4,2E-02 | -1,93            | -1,88            | -1,69            |
| SPRR1A    | -1,94                | 7,4E-02 | -1,70                | 1,9E-01 | -1,11                | 7,2E-01 | -1,08            | -1,12            | -1,07            |
| FGFR3     | -3,19                | 2,1E-02 | -2,39                | 8,4E-02 | -1,80                | 1,3E-01 | 1,34             | 1,10             | -1,02            |
| SPRR1B    | -2,25                | 6,4E-01 | -1,69                | 7,7E-01 | -1,42                | 8,2E-01 | -1,19            | -1,07            | -1,11            |

| Gene    | HMEC-hTERT<br>SNAIL1 |         | HMEC-hTERT<br>SNAIL2 |         | HMEC-hTERT<br>SNAIL3 |         | MCF10A<br>SNAIL1 | MCF10A<br>SNAIL2 | MCF10A<br>SNAIL3 |
|---------|----------------------|---------|----------------------|---------|----------------------|---------|------------------|------------------|------------------|
|         | FC                   | P-value | FC                   | P-value | FC                   | P-value | FC               | FC               | FC               |
| FBLN5   | 1,15                 | 1,9E-01 | 1,03                 | 8,4E-01 | 1,05                 | 6,5E-01 | 1,95             | 1,32             | 1,14             |
| GREM1   | 4,33                 | 3,2E-01 | 1,38                 | 9,2E-01 | 1,03                 | 9,9E-01 | -1,11            | -1,16            | -1,01            |
| COL3A1  | -1,06                | 9,9E-01 | -1,08                | 9,9E-01 | -1,08                | 9,9E-01 | 1,07             | 1,05             | 1,01             |
| COL1A2  | 1,89                 | 1,4E-01 | 1,02                 | 9,7E-01 | 1,01                 | 9,8E-01 | -1,05            | 1,04             | 1,04             |
| DCN     | 6,68                 | 1,3E-02 | 1,59                 | 8,0E-01 | 1,07                 | 9,7E-01 | 4,49             | 2,89             | 1,90             |
| CDH2    | 3,34                 | 9,9E-03 | 1,95                 | 3,1E-01 | 1,35                 | 6,7E-01 | 1,16             | 1,28             | 1,35             |
| ENPP2   | 1,27                 | 6,6E-01 | -1,07                | 9,3E-01 | -1,08                | 9,1E-01 | 1,18             | 1,13             | 1,08             |
| POSTN   | 1,43                 | 2,4E-01 | 1,14                 | 7,3E-01 | 1,05                 | 8,9E-01 | 2,39             | 1,67             | 1,20             |
| RGS4    | 8,39                 | 1,6E-02 | 1,71                 | 8,2E-01 | 1,05                 | 9,9E-01 | 1,01             | 1,08             | 1,01             |
| CSORF13 | 4,05                 | 9,5E-03 | 1,57                 | 6,3E-01 | 1,12                 | 9,1E-01 | 1,53             | 1,26             | 1,41             |
| PRRX1   | 1,00                 | 1,0E+00 | -1,02                | 9,4E-01 | 1,02                 | 9,3E-01 | 1,05             | -1,04            | 1,07             |
| FBN1    | 2,23                 | 9,3E-05 | 1,14                 | 5,7E-01 | 1,12                 | 5,9E-01 | 1,30             | 1,12             | -1,02            |
| SRGN    | 1,77                 | 9,1E-05 | 1,12                 | 4,4E-01 | -1,05                | 7,5E-01 | 15,85            | 6,29             | 2,70             |
| SPOCK1  | 4,81                 | 3,5E-09 | 2,41                 | 3,0E-04 | 1,56                 | 4,2E-02 | 2,08             | 1,62             | 1,50             |
| PRR16   | 1,67                 | 1,2E-02 | 1,11                 | 6,8E-01 | 1,07                 | 7,6E-01 | 3,10             | 1,89             | 1,55             |
| DLC1    | 1,10                 | 4,4E-02 | 1,02                 | 7,1E-01 | 1,06                 | 2,6E-01 | 1,03             | 1,03             | 1,01             |
| BIN1    | 1,82                 | 1,2E-04 | 1,11                 | 5,2E-01 | 1,04                 | 7,8E-01 | 1,63             | 1,24             | 1,20             |
| RGL1    | 3,24                 | 1,6E-03 | 1,96                 | 1,6E-01 | 1,44                 | 4,6E-01 | 1,84             | 1,65             | 1,49             |
| IGFBP4  | 3,51                 | 9,9E-04 | 1,68                 | 3,4E-01 | 1,22                 | 7,2E-01 | 2,18             | 1,46             | 1,33             |
| PVRL3   | 2,94                 | 6,6E-04 | 1,68                 | 2,0E-01 | 1,16                 | 7,2E-01 | 3,09             | 1,94             | 1,63             |
| CDH11   | 13,50                | 2,6E-02 | 4,11                 | 6,0E-01 | 1,40                 | 9,4E-01 | 1,13             | 1,18             | -1,00            |
| OLFML3  | 1,04                 | 3,7E-01 | -1,00                | 9,8E-01 | 1,01                 | 9,0E-01 | 1,09             | 1,01             | 1,13             |
| MMP2    | 1,23                 | 1,6E-02 | 1,17                 | 1,0E-01 | 1,05                 | 5,9E-01 | 1,02             | -1,11            | 1,13             |
| MYL9    | 3,73                 | 3,7E-02 | 1,25                 | 8,6E-01 | 1,09                 | 9,5E-01 | 2,56             | 1,33             | 1,07             |
| COL5A2  | 7,03                 | 5,4E-04 | 2,36                 | 3,8E-01 | 1,29                 | 8,3E-01 | 1,14             | 1,11             | 1,11             |
| CTGF    | 10,19                | 9,7E-15 | 4,19                 | 6,3E-09 | 1,64                 | 4,6E-03 | 5,01             | 3,07             | 2,05             |
| ZEB1    | 1,26                 | 8,3E-04 | 1,09                 | 2,3E-01 | 1,05                 | 4,5E-01 | 1,22             | -1,00            | 1,10             |
| ROR1    | -1,10                | 4,8E-02 | -1,18                | 1,1E-02 | -1,16                | 1,1E-02 | -1,03            | 1,12             | 1,05             |
| PTGER2  | 2,73                 | 2,1E-05 | -1,10                | 7,6E-01 | -1,09                | 7,7E-01 | 1,19             | -1,04            | -1,21            |
| CHN1    | 2,63                 | 1,7E-02 | 1,32                 | 6,6E-01 | 1,13                 | 8,4E-01 | 1,35             | 1,33             | 1,28             |
| PMP22   | 2,79                 | 5,5E-07 | 1,98                 | 6,1E-04 | 1,34                 | 9,3E-02 | 1,22             | 1,26             | 1,30             |
| TRAM2   | 2,61                 | 5,6E-03 | 1,55                 | 3,5E-01 | 1,16                 | 7,6E-01 | 1,72             | 1,52             | 1,17             |
| TAGLN   | 5,47                 | 1,3E-03 | 1,54                 | 6,8E-01 | -1,05                | 9,7E-01 | 5,78             | 3,56             | 2,17             |
| TNFAIP6 | 1,49                 | 1,7E-02 | 1,08                 | 7,0E-01 | -1,00                | 9,8E-01 | 1,13             | -1,09            | -1,03            |
| CREB3L1 | -1,04                | 4,7E-01 | 1,02                 | 7,3E-01 | -1,01                | 8,2E-01 | 1,12             | 1,01             | 1,01             |
| UGDH    | 1,17                 | 2,1E-02 | 1,06                 | 4,3E-01 | 1,01                 | 8,3E-01 | 1,28             | 1,13             | 1,17             |
| HAS2    | 3,20                 | 1,7E-06 | 1,69                 | 3,4E-02 | 1,28                 | 2,9E-01 | 1,14             | 1,00             | 1,06             |
| DNAJB4  | 3,03                 | 1,1E-02 | 1,19                 | 8,2E-01 | 1,05                 | 9,4E-01 | 1,75             | 1,37             | 1,18             |
| CDKN2C  | 1,13                 | 2,0E-01 | 1,09                 | 4,5E-01 | -1,03                | 7,7E-01 | 1,17             | 1,08             | 1,00             |
| CCDC92  | 1,11                 | 3,4E-01 | 1,01                 | 9,3E-01 | 1,08                 | 4,9E-01 | 1,28             | 1,24             | 1,35             |
| WNT5A   | 6,01                 | 8,0E-03 | 2,61                 | 4,0E-01 | 1,67                 | 6,9E-01 | 3,31             | 2,49             | 1,75             |
| IGFBP3  | 1,20                 | 3,3E-01 | -2,99                | 1,5E-02 | -1,56                | 1,1E-01 | 3,51             | 2,81             | 1,83             |
| PPM1D   | 1,22                 | 8,1E-04 | -1,05                | 4,1E-01 | -1,07                | 2,2E-01 | 1,27             | 1,23             | 1,12             |
| FILIP1L | 1,52                 | 3,5E-03 | 1,12                 | 4,9E-01 | 1,03                 | 8,7E-01 | -1,01            | 1,01             | -1,04            |
| PDGFC   | 1,87                 | 1,2E-03 | 1,27                 | 2,9E-01 | 1,04                 | 8,6E-01 | 1,45             | 1,20             | 1,05             |
| TBX3    | 1,87                 | 8,1E-06 | 1,27                 | 6,6E-02 | 1,07                 | 5,7E-01 | 1,32             | 1,14             | 1,24             |
| XYLT1   | 1,33                 | 5,2E-07 | 1,16                 | 1,6E-03 | 1,02                 | 5,6E-01 | -1,04            | 1,04             | -1,02            |
| FAP     | 2,25                 | 7,0E-04 | 1,60                 | 9,0E-02 | 1,31                 | 3,0E-01 | 1,71             | 1,60             | 1,25             |
| DPT     | 1,09                 | 4,6E-01 | 1,02                 | 8,7E-01 | 1,08                 | 5,0E-01 | -1,23            | -1,19            | -1,29            |
| STC1    | 4,12                 | 9,0E-06 | 1,95                 | 7,5E-02 | 1,31                 | 4,9E-01 | -1,29            | -1,16            | 1,10             |
| KRT81   | 1,04                 | 5,3E-01 | 1,04                 | 6,4E-01 | -1,01                | 8,5E-01 | -1,07            | -1,04            | -1,06            |
| MMP1    | 1,98                 | 6,6E-05 | 2,53                 | 5,8E-06 | 1,92                 | 2,1E-04 | -1,00            | -1,02            | -1,08            |
| HS3ST2  | 1,00                 | 1,0E+00 | 1,03                 | 7,5E-01 | -1,02                | 8,5E-01 | 1,04             | 1,00             | 1,05             |
| LMCD1   | 1,39                 | 1,9E-03 | 1,04                 | 7,4E-01 | 1,03                 | 7,7E-01 | 2,41             | 1,55             | 1,16             |
| N-PAC   | -1,24                | 5,0E-03 | -1,14                | 1,0E-01 | -1,14                | 6,3E-02 | -1,07            | -1,10            | 1,02             |
| NR2F1   | 1,25                 | 3,3E-01 | -1,36                | 3,9E-01 | -1,26                | 4,5E-01 | 4,67             | 2,59             | 1,52             |
| SCCPDH  | 1,01                 | 7,6E-01 | -1,11                | 1,1E-01 | -1,09                | 1,3E-01 | 1,13             | 1,05             | -1,02            |
| MLPH    | 3,45                 | 4,4E-05 | 1,54                 | 2,5E-01 | 1,10                 | 8,1E-01 | 1,96             | 1,79             | 1,54             |
| LTBP2   | 1,64                 | 3,8E-05 | 1,70                 | 7,7E-05 | 1,43                 | 1,7E-03 | 1,37             | 1,23             | 1,21             |
| TPM1    | 2,06                 | 6,7E-04 | 1,14                 | 6,2E-01 | -1,02                | 9,2E-01 | 2,56             | 1,50             | 1,20             |
| DDR2    | 1,12                 | 3,0E-01 | 1,05                 | 7,3E-01 | 1,04                 | 7,7E-01 | -1,02            | 1,02             | -1,02            |
| SEMA5A  | 2,19                 | 8,1E-04 | 1,21                 | 5,1E-01 | 1,09                 | 7,4E-01 | 1,03             | -1,03            | 1,02             |
| TGFB11  | 2,44                 | 1,6E-06 | 1,84                 | 8,7E-04 | 1,32                 | 8,0E-02 | 2,36             | 1,76             | 1,46             |
| PCOLCE  | 1,38                 | 4,8E-02 | 1,20                 | 3,5E-01 | 1,13                 | 5,0E-01 | 1,21             | 1,18             | 1,08             |
| STARD13 | 1,36                 | 1,0E-04 | -1,02                | 7,7E-01 | -1,03                | 6,5E-01 | 1,45             | 1,28             | 1,20             |
| NID1    | 1,85                 | 5,8E-03 | 1,08                 | 8,0E-01 | 1,04                 | 8,8E-01 | -1,06            | -1,06            | -1,06            |
| SYNC1   | 2,68                 | 4,7E-04 | 1,45                 | 3,0E-01 | 1,20                 | 6,1E-01 | 1,35             | 1,36             | 1,28             |
| ENOX1   | 1,00                 | 1,0E+00 | -1,11                | 2,6E-01 | -1,13                | 1,6E-01 | 1,21             | 1,11             | 1,10             |
| FSTL1   | 4,10                 | 3,6E-05 | 2,16                 | 6,1E-02 | 1,70                 | 1,9E-01 | 3,12             | 2,16             | 1,75             |
| VIM     | 7,94                 | 1,7E-09 | 5,75                 | 5,6E-07 | 2,81                 | 1,1E-03 | 1,50             | 1,31             | 1,36             |
| MME     | 3,27                 | 2,9E-05 | 1,21                 | 6,0E-01 | 1,04                 | 9,2E-01 | 1,37             | 1,36             | 1,28             |
| LTBP1   | 1,12                 | 1,7E-03 | 1,04                 | 2,8E-01 | -1,02                | 5,5E-01 | 1,43             | 1,07             | 1,07             |
| NRP1    | 1,85                 | 2,6E-02 | 1,38                 | 3,6E-01 | 1,24                 | 5,1E-01 | 1,72             | 1,47             | 1,45             |
| THY1    | 4,95                 | 5,6E-04 | 2,26                 | 2,3E-01 | 1,60                 | 5,1E-01 | 1,03             | -1,06            | -1,09            |
| NEBL    | 1,39                 | 2,1E-02 | -1,39                | 1,4E-01 | -1,21                | 3,0E-01 | 1,08             | 1,06             | 1,02             |
| TNS3    | 2,08                 | 4,5E-06 | 1,36                 | 3,8E-02 | 1,15                 | 2,9E-01 | 1,17             | 1,19             | 1,25             |
| ECM1    | 1,07                 | 5,6E-01 | -1,02                | 9,1E-01 | -1,06                | 6,6E-01 | 1,22             | 1,23             | 1,06             |
| FBLN1   | 1,08                 | 5,2E-01 | -1,33                | 1,2E-01 | -1,19                | 2,5E-01 | 1,82             | 1,51             | 1,26             |
| TUBA1A  | -1,04                | 7,4E-01 | 1,04                 | 7,7E-01 | 1,07                 | 5,1E-01 | -1,08            | -1,14            | 1,00             |
| COP2    | 1,54                 | 3,1E-05 | 1,15                 | 1,4E-01 | 1,05                 | 5,6E-01 | 1,27             | 1,07             | 1,02             |
| CYBRD1  | 1,94                 | 4,5E-06 | 1,46                 | 5,7E-03 | 1,21                 | 1,1E-01 | 2,35             | 1,66             | 1,61             |
| PPAP2B  | 3,75                 | 9,3E-04 | 1,15                 | 8,4E-01 | -1,02                | 9,7E-01 | 1,87             | 1,44             | 1,23             |
| PTX3    | 2,16                 | 2,5E-03 | 1,15                 | 6,9E-01 | 1,03                 | 9,3E-01 | 1,27             | 1,19             | 1,21             |
| FADS2   | -1,02                | 7,3E-01 | -1,09                | 3,2E-01 | -1,03                | 7,0E-01 | -1,18            | -1,19            | -1,06            |
| BGN     | 7,35                 | 2,9E-01 | 1,65                 | 9,3E-01 | 1,05                 | 9,9E-01 | 1,81             | 1,29             | 1,14             |
| TSHZ1   | 1,16                 | 2,5E-02 | 1,09                 | 2,6E-01 | 1,04                 | 5,6E-01 | 1,31             | 1,14             | 1,09             |
| ZBTB38  | 1,41                 | 8,5E-03 | 1,22                 | 1,7E-01 | 1,01                 | 9,3E-01 | -1,12            | -1,08            | -1,41            |
